# Supplementary figures and images for: Interspecific variation of olfactory preferences in flies, mice, and humans
Source: PubMed Central journal article supplement — Chem Senses. 2018 Nov 15;44(1):7–9. doi: 10.1093/chemse/bjy074 (PMC6295792; doi:10.1093/chemse/bjy074), 2018-11-15

**a**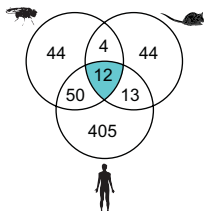**b**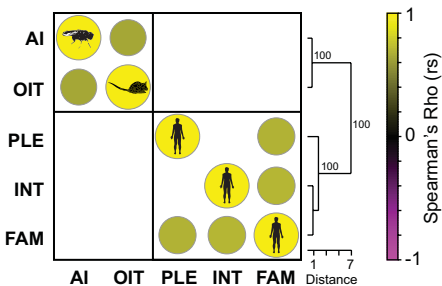**c**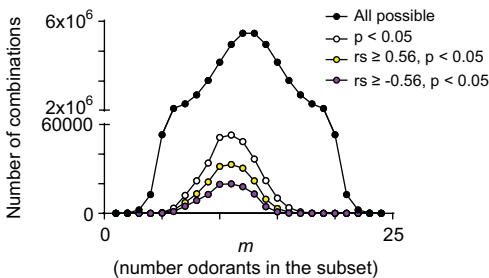**d**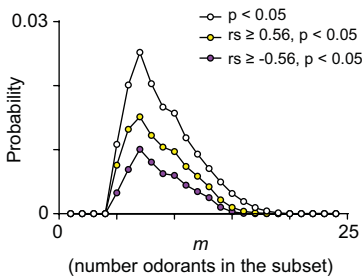

Supplement: bjy074_suppl_supplementary_figure.pdf [file bjy074_suppl_supplementary_figure.pdf]
